# Supplementary material for: Uptake kinetics of spontaneously emulsified microdroplets at an air–liquid interface
Source: Royal Society of Chemistry journal article supplement (doi:10.1039/d2sm00511e), 2022-01-01
Supplement: d2sm00511e1.pdf [file d2sm00511e1.pdf]

## Supplementary Information

### 1 Physico-chemical characteristics of studied pure liquids

|               | Molar mass<br>(g/mol) | Density<br>at 298 K (g/mL) [1] | Dynamic viscosity<br>(mPa.s) | Surface tension<br>(mN/m) | Refractive index<br>[1] |
|---------------|-----------------------|--------------------------------|------------------------------|---------------------------|-------------------------|
| Cyclopentanol | 86.13                 | 0.948                          | 10.1                         | 32.7                      | 1.4530                  |
| Decane        | 142.28                | 0.730                          | 0.8                          | 23.7                      | 1.4102                  |
| PDMS          | ≈116000               | 0.973                          | 58 380 (from supplier)       | 20.5                      | 1.4035                  |

[1] David R. Lide. CRC Handbook of Chemistry and Physics, 75th edition. CRC Press, Boca Raton, FL, 1994.

### 2 Surface tension of different mixtures

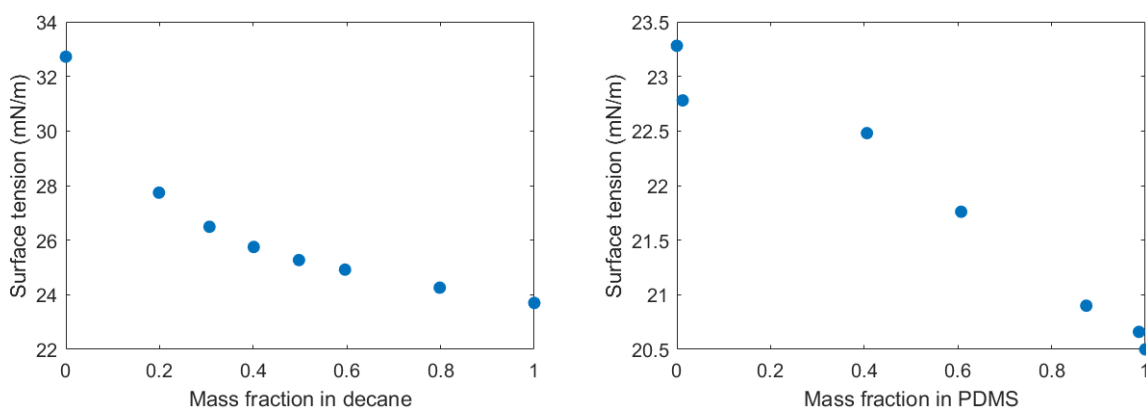

Figure 1 Surface tension of the decane/cyclopentanol mixture (left) and PDMS/decane mixture (right).

### 3 Viscosity of the decane/cyclopentanol mixture

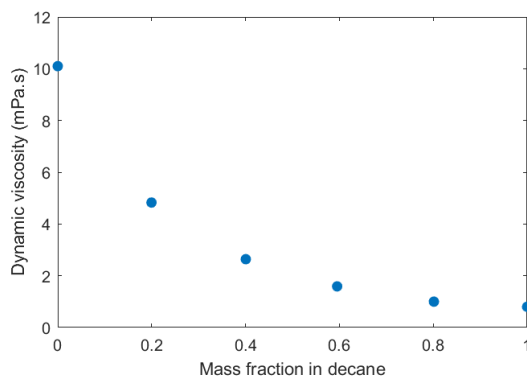

Figure 2 Viscosity of a decane/cyclopentanol mixture as a function of decane mass fraction. Measurements were done with a rheometer (Low Shear 400, Lamy Reology).

# 4 Phase diagram of the ternary mixture

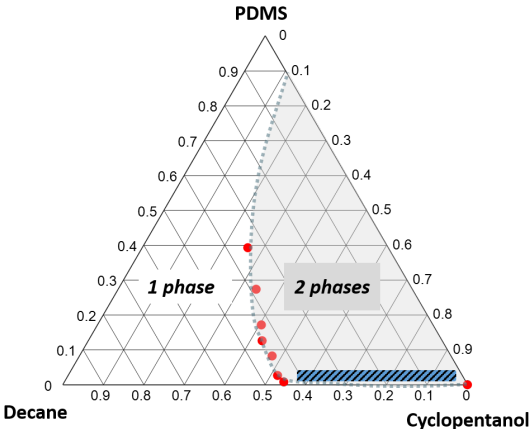

**Figure 3** Phase diagram of the ternary mixture (mass fractions). Red dots correspond to experimental data. The dashed line is a guide for the eyes. The hatched zone represents the range of compositions used in the paper. To obtain experimental data, we first mix PDMS and decane at a given ratio and then add cyclopentanol until the solution becomes turbid. The solution is constantly stirred during the experiment. It is repeated for different PDMS / decane ratios. High PDMS ratios can not be explored as the solution becomes too viscous to be stirred easily.
